# Supplementary material
Source: PubMed Central journal article supplement (PMC7668117)
Supplement: NIHMS1644931-supplement-Table_S1.pdf [file NIHMS1644931-supplement-Table_S1.pdf]

**Table S1. Results of primary sequence analysis of insect transferrins.**

| <b>Species</b>                 | <b>Accession number</b>    | <b>Orthologous Group</b> | <b>Predicted signal peptide</b> | <b>Predicted C-terminal trans-membrane region</b> | <b>Predicted GPI anchor</b> | <b>Predicted iron binding†</b> |
|--------------------------------|----------------------------|--------------------------|---------------------------------|---------------------------------------------------|-----------------------------|--------------------------------|
| <i>Drosophila melanogaster</i> | AAC67389                   | Tsf1                     | Yes                             | No                                                | No                          | Yes                            |
|                                | NP_524044                  | Tsf2                     | Yes                             | Yes                                               | Yes                         | Yes                            |
|                                | NP_523759                  | Tsf3                     | Yes                             | Yes                                               | Yes                         | No                             |
| <i>Aedes aegypti</i>           | XP_001647719               | Tsf1                     | Yes                             | No                                                | No                          | Yes                            |
|                                | XP_021699709               | Tsf2                     | Yes                             | Yes                                               | Yes                         | No                             |
|                                | EAT34844 edited            | Tsf3                     | Yes                             | Yes                                               | Yes                         | No                             |
|                                | XP_001661801               | Tsf4                     | Yes                             | Yes                                               | Yes                         | No                             |
| <i>Ctenocephalides felis</i>   | XP_026466165               | Tsf1                     | Yes                             | No                                                | No                          | Yes                            |
|                                | XP_026479930               | Tsf2                     | Yes                             | Yes                                               | Yes                         | Yes                            |
|                                | XP_026471608 and 026471609 | Tsf3                     | Yes                             | Yes                                               | Yes                         | No                             |
| <i>Manduca sexta</i>           | P22297                     | Tsf1                     | Yes                             | No                                                | No                          | Yes                            |
|                                | Msex2.11184 edited         | Tsf2                     | Yes                             | Yes                                               | Yes                         | No                             |
|                                | Msex2.10792 and 10793      | Tsf3                     | Yes                             | Yes                                               | Yes                         | No                             |
|                                | Msex2.12754-RB             | Tsf4                     | Yes                             | Yes                                               | Yes                         | No                             |
| <i>Papilio xuthus</i>          | XP_013173464               | Tsf1                     | Yes                             | No                                                | No                          | Yes                            |
|                                | KPJ03186                   | Tsf2                     | Yes                             | Yes                                               | Yes                         | No                             |
|                                | KPI99226                   | Tsf3                     | No                              | Yes                                               | Yes                         | No                             |
|                                | KPI99233 edited            | Tsf4                     | Yes                             | Yes                                               | Yes                         | No                             |
| <i>Annulipalpia species</i>    | GATX01086443               | Tsf1                     | Yes                             | No                                                | No                          | Yes                            |
|                                | GATX01000541               | Tsf2                     | Yes                             | Yes                                               | No                          | No                             |
|                                | GATX01016449 edited        | Tsf3                     | Yes                             | No                                                | No                          | No                             |
|                                | GATX01086805               | Tsf4                     | Yes                             | Yes                                               | Yes                         | No                             |
| <i>Micropterna lateralis</i>   | GELV01013828               | Tsf2                     | Yes                             | Yes                                               | Yes                         | No                             |
|                                | GELV01010679               | Tsf3                     | Yes                             | Yes                                               | Yes                         | No                             |
|                                | GELV01015247               | Tsf4                     | Yes                             | Yes                                               | Yes                         | No                             |
| <i>Tribolium castaneum</i>     | XP_001808066               | Tsf1                     | Yes                             | No                                                | No                          | Yes                            |
|                                | XP_015839046               | Tsf2                     | Yes                             | Yes                                               | No                          | No                             |
|                                | XP_015838610               | Tsf3                     | Yes                             | Yes                                               | Yes                         | No                             |
|                                | XP_008199941 edited        | Tsf4                     | Yes                             | Yes                                               | Yes                         | No                             |
| <i>Apis mellifera</i>          | NP_001011572               | Tsf1                     | Yes                             | No                                                | No                          | Yes                            |
|                                | XP_396618                  | Tsf2                     | Yes                             | Yes                                               | Yes                         | Yes                            |
|                                | XP_001122328 edited        | Tsf3                     | Yes                             | Yes                                               | No                          | No                             |
| <i>Pediculus humanus</i>       | XP_002422999               | Tsf2                     | No                              | Yes                                               | No                          | Yes                            |
|                                | XP_002425773 edited        | Tsf3                     | Yes                             | No                                                | Yes                         | No                             |

|                                      |                                     |      |     |     |     |     |
|--------------------------------------|-------------------------------------|------|-----|-----|-----|-----|
| <i>Acyrtosiphon pisum</i>            | XP_001947699                        | Tsf2 | Yes | Yes | Yes | No  |
|                                      | XP_016660805                        | Tsf2 | Yes | No  | No  | No  |
|                                      | XP_001946481                        | Tsf3 | Yes | Yes | Yes | No  |
| <i>Rhodnius prolixus</i>             | GECK01013297                        | Tsf1 | Yes | No  | No  | Yes |
|                                      | GECK01101790                        | Tsf2 | Yes | Yes | Yes | No  |
|                                      | GECK01023379                        | Tsf4 | Yes | Yes | Yes | No  |
| <i>Frankliniella occidentalis</i>    | XP_026287309                        | Tsf2 | Yes | Yes | Yes | Yes |
|                                      | XP_026287716                        | Tsf4 | Yes | Yes | Yes | No  |
| <i>Zootermopsis nevadensis</i>       | XP_021919348                        | Tsf1 | Yes | No  | No  | Yes |
|                                      | XP_021922858                        | Tsf2 | Yes | Yes | Yes | Yes |
|                                      | XP_021919332 edited                 | Tsf3 | Yes | Yes | Yes | No  |
|                                      | XP_021919264                        | Tsf4 | Yes | Yes | Yes | No  |
| <i>Blaberus discoidalis</i>          | Q02942                              | Tsf1 | Yes | No  | No  | Yes |
| <i>Medauroidea extradentata</i>      | GAWD01077063                        | Tsf1 | No  | No  | No  | Yes |
|                                      | GAWD01046554                        | Tsf2 | Yes | Yes | Yes | Yes |
|                                      | GAWD01030369                        | Tsf3 | Yes | Yes | Yes | No  |
|                                      | GAWD01074570                        | Tsf4 | Yes | Yes | Yes | No  |
| <i>Locusta migratoria</i>            | BBE27867                            | Tsf1 | Yes | No  | No  | Yes |
|                                      | JAMg_model_8133                     | Tsf2 | Yes | Yes | Yes | Yes |
|                                      | JAMg_model_4881                     | Tsf3 | Yes | Yes | Yes | No  |
| <i>Ephemera danica</i>               | Ed_EDAN016810 edited                | Tsf2 | Yes | Yes | Yes | Yes |
|                                      | EDAN009681_PA                       | Tsf3 | No  | Yes | Yes | No  |
|                                      | EDAN001636_PA                       | Tsf4 | Yes | Yes | Yes | No  |
| <i>Ladona fulva</i>                  | LFUL008155_PA edit                  | Tsf1 | Yes | No  | No  | Yes |
|                                      | LFUL002433 and LFUL002434 (has gap) | Tsf2 | Yes | Yes | Yes | No  |
|                                      | LFUL016472 and LFUL016473 (has gap) | Tsf3 | No  | Yes | Yes | No  |
| <i>Atelura formicaria</i>            | GAYJ02040055                        | Tsf1 | Yes | No  | No  | Yes |
|                                      | GAYJ02040158                        | Tsf3 | Yes | Yes | Yes | No  |
|                                      | GAYJ02044273                        | Tsf4 | No  | Yes | No  | No  |
| <i>Thermobia domestica</i>           | GASN02065056                        | Tsf1 | Yes | No  | No  | Yes |
|                                      | GASN02058069                        | Tsf3 | Yes | Yes | Yes | No  |
|                                      | GHEH01000467                        | Tsf4 | Yes | Yes | Yes | No  |
| <i>Meinertellus cundinamarcensis</i> | GAUG02039070                        |      | Yes | Yes | Yes | Yes |
|                                      | GAUG02047150*                       |      | -   | No  | No  | -   |

†For Tsf2 predictions, two signatures were predicted to be iron binding: DYHNTT and DYYNTT.

\*Gene prediction has an amino-terminal truncation that prevents signal peptide and iron binding predictions.
