# Supplementary material
Source: PubMed Central journal article supplement (PMC7668117)

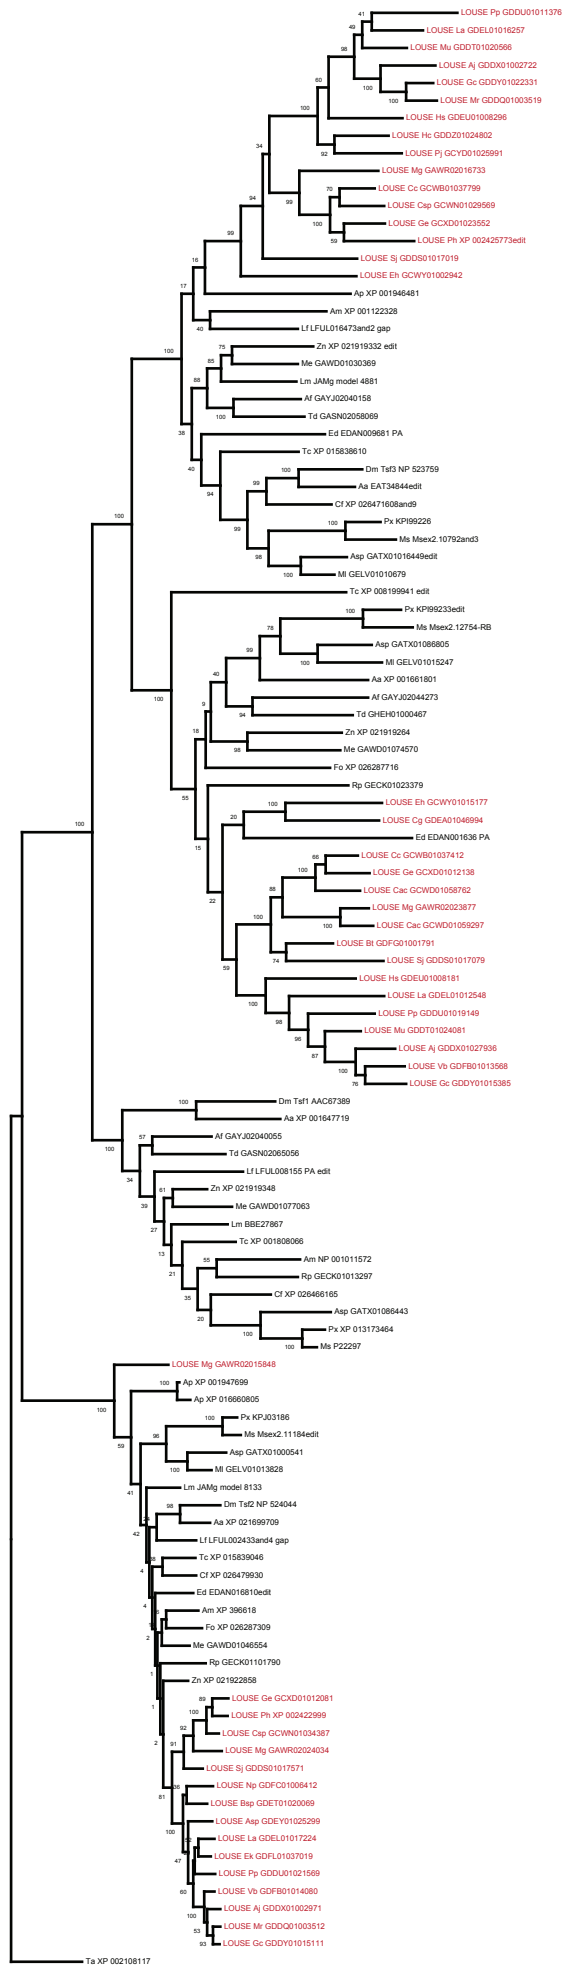

Tsf3

Tsf4

Tsf1

Tsf2

Supplement: NIHMS1644931-supplement-Figure_S1.pdf [file NIHMS1644931-supplement-Figure_S1.pdf]

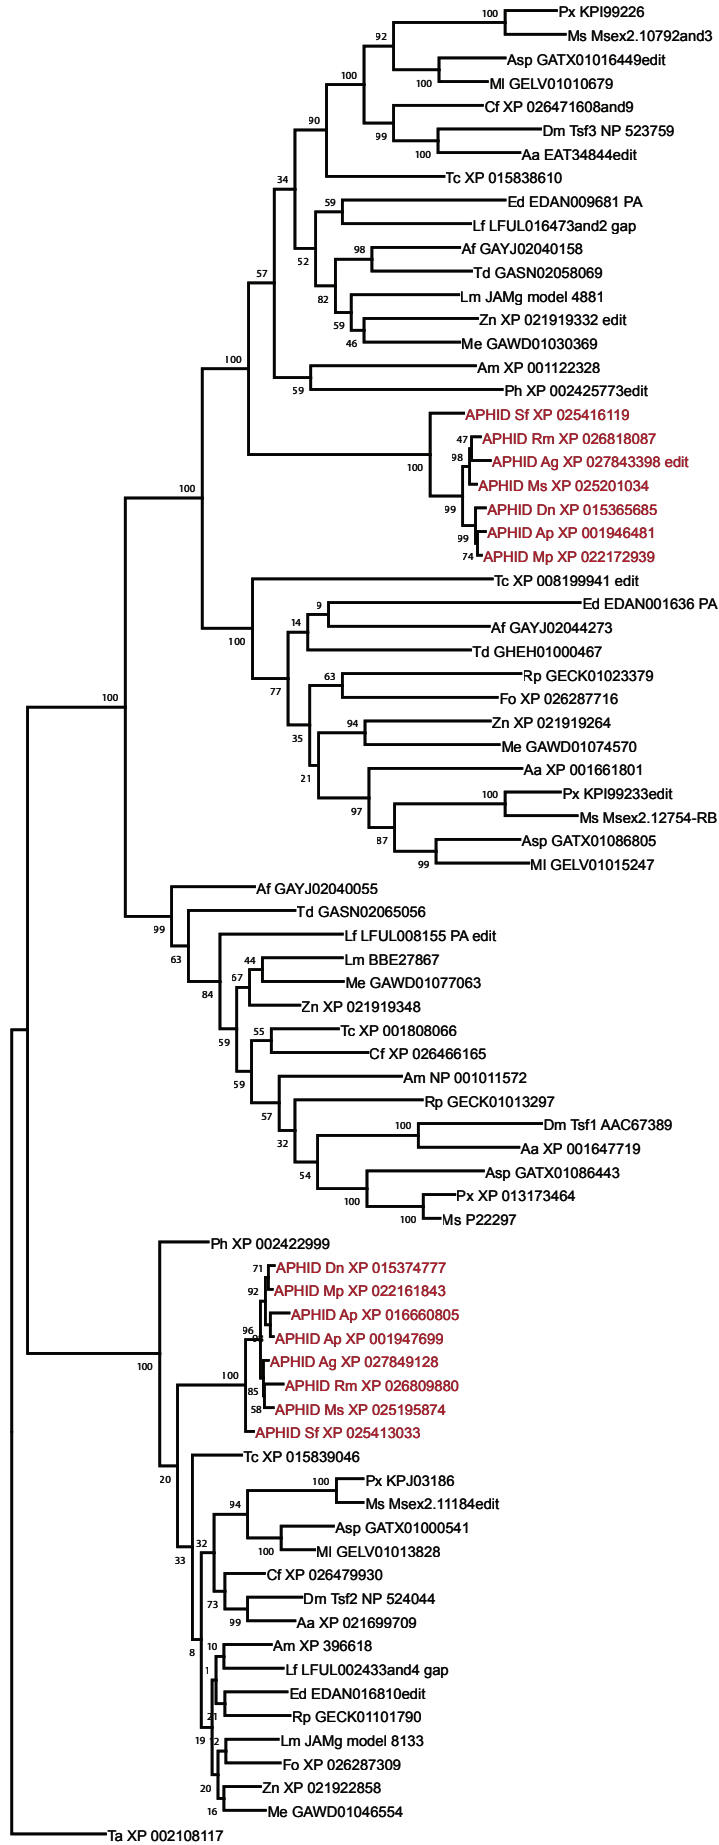

Tsf3

Tsf4

Tsf1

Tsf2

0.50

Supplement: NIHMS1644931-supplement-Figure_S2.pdf [file NIHMS1644931-supplement-Figure_S2.pdf]

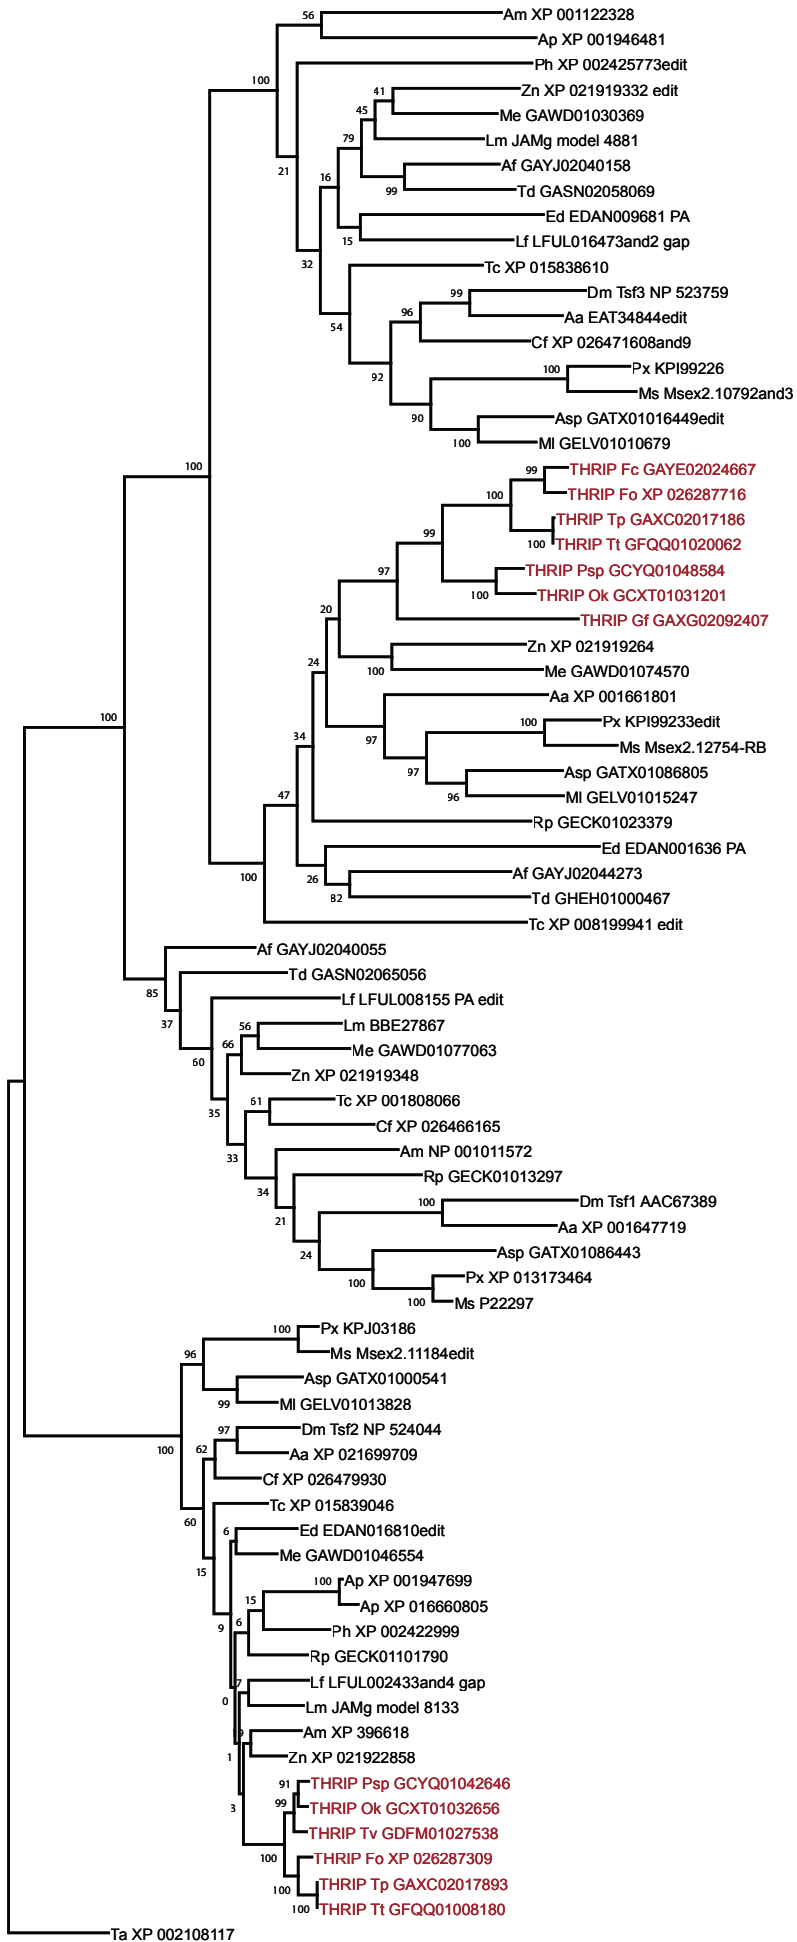

Tsf3

Tsf4

Tsf1

Tsf2

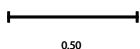

Supplement: NIHMS1644931-supplement-Figure_S3.pdf [file NIHMS1644931-supplement-Figure_S3.pdf]

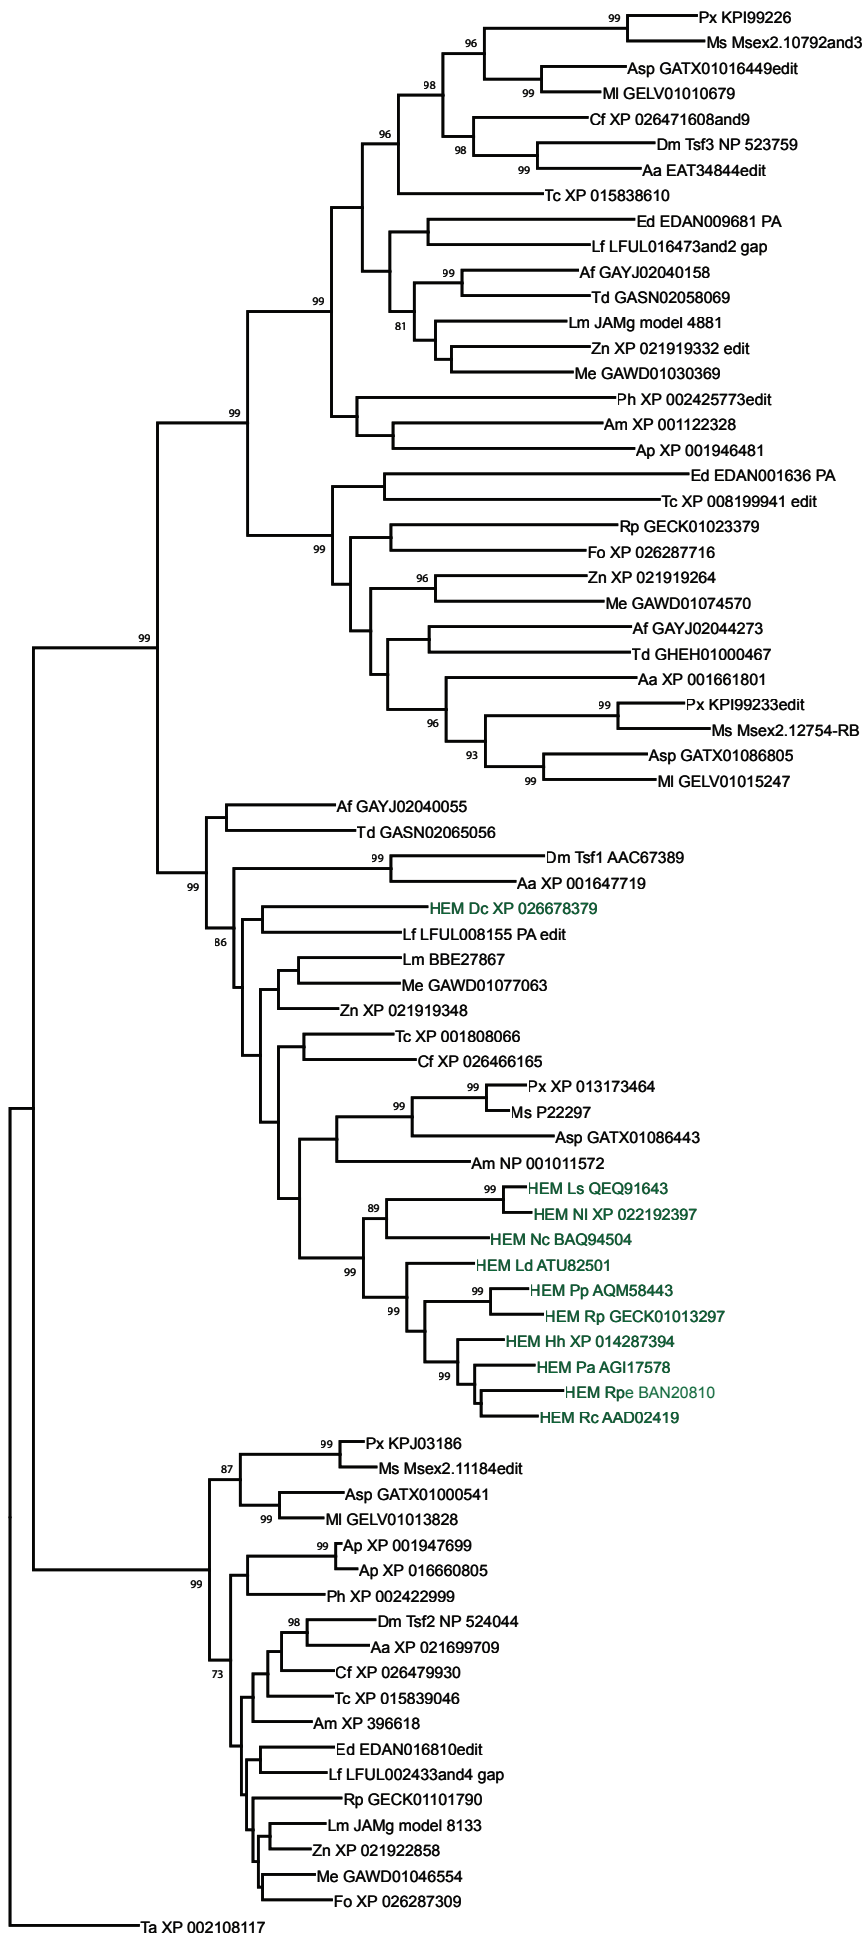

Tsf3

Tsf4

Tsf1

Tsf2

Supplement: NIHMS1644931-supplement-Figure_S4.pdf [file NIHMS1644931-supplement-Figure_S4.pdf]
